# Supplementary material
Source: PubMed Central journal article supplement (PMC6919277)
Supplement: NIHMS1061640-supplement-Tables.pdf [file NIHMS1061640-supplement-Tables.pdf]

**Supplementary Table 1. Dataset quality control**

| <b>Quality control criteria applied</b>                                                                                                            | <b>Total</b> | <b>Cases</b> | <b>Controls</b> |
|----------------------------------------------------------------------------------------------------------------------------------------------------|--------------|--------------|-----------------|
| Total samples in initial dataset                                                                                                                   | 15,722       | 5,073        | 10,649          |
| Samples successfully incorporated into VCF                                                                                                         | 15,428       | 4,851        | 10,577          |
| Initial sample QC:<br>(1) Removed call rate <90<br>(2) Removed dp Mean <10<br>(3) Removed gq Mean <65                                              | 14,143       | 4,569        | 10,575          |
| Sex imputation:<br>(1) Removed samples with ambiguous sex                                                                                          | 15,128       | 4,558        | 10,570          |
| Principal component analysis:<br>(1) Case vs controls<br>(2) Case, controls, and 1000 Genomes<br>(3) Isolated overlapping case and control samples | 12,317       | 4,429        | 7,888           |
| Identity by descent:<br>(1) Removed related or duplicated samples, IBD > 0.2                                                                       | 11,703       | 3,864        | 7,839           |

**Supplementary Table 2. Proposed ALS genes and their signals under the protein-truncating variant model**

| Gene             | Qualifying variants in cases (3,864) | Qualifying variants in controls (7,839) | Qualifying variants in total controls (28,910) | OR<br>N <sub>cases</sub> : 3,864<br>N <sub>controls</sub> : 7,839 | P-value<br>N <sub>cases</sub> : 3,864<br>N <sub>controls</sub> : 7,839 | OR<br>N <sub>cases</sub> : 3,864<br>N <sub>controls</sub> : 28,910 | P-value<br>N <sub>cases</sub> : 3,864<br>N <sub>controls</sub> : 28,910 |
|------------------|--------------------------------------|-----------------------------------------|------------------------------------------------|-------------------------------------------------------------------|------------------------------------------------------------------------|--------------------------------------------------------------------|-------------------------------------------------------------------------|
| <i>ALS2</i>      | 2                                    | 5                                       | 17                                             | 0.81                                                              | 1.00                                                                   | 0.88                                                               | 1.00                                                                    |
| <i>ANG</i>       | NA                                   | NA                                      | NA                                             | NA                                                                | NA                                                                     | NA                                                                 | NA                                                                      |
| <i>ARHGEF28</i>  | 5                                    | 4                                       | 16                                             | 2.54                                                              | 0.17                                                                   | 2.34                                                               | 0.09                                                                    |
| <i>ARPP21</i>    | 0                                    | 1                                       | 10                                             | 0.68                                                              | 1.00                                                                   | 0.36                                                               | 0.62                                                                    |
| <i>ATXN2</i>     | 0                                    | 1                                       | 45                                             | 0.68                                                              | 1.00                                                                   | 0.08                                                               | 8.38×10 <sup>-3</sup> #                                                 |
| <i>C21orf2</i>   | 1                                    | 2                                       | 9                                              | 1.01                                                              | 0.02                                                                   | 0.84                                                               | 1.00                                                                    |
| <i>C9orf72</i>   | 1                                    | 2                                       | 13                                             | 1.01                                                              | 0.02                                                                   | 0.58                                                               | 1.00                                                                    |
| <i>CENPV</i>     | NA                                   | NA                                      | NA                                             | NA                                                                | NA                                                                     | NA                                                                 | NA                                                                      |
| <i>CHMP2B</i>    | 4                                    | 1                                       | 31                                             | 8.12                                                              | 0.04                                                                   | 0.97                                                               | 1.00                                                                    |
| <i>DAO</i>       | 0                                    | 2                                       | 27                                             | 0.41                                                              | 1.00                                                                   | 0.14                                                               | 0.07                                                                    |
| <i>DCTN1</i>     | 1                                    | 1                                       | 9                                              | 2.03                                                              | 0.55                                                                   | 0.83                                                               | 1.00                                                                    |
| <i>FIG4</i>      | 9                                    | 13                                      | 51                                             | 1.41                                                              | 0.50                                                                   | 1.32                                                               | 0.42                                                                    |
| <i>FUS</i>       | 6                                    | 0                                       | 0                                              | 26.41                                                             | 1.29×10 <sup>-3</sup>                                                  | 97.40                                                              | 2.68×10 <sup>-6</sup> #                                                 |
| <i>GRN</i>       | 1                                    | 1                                       | 8                                              | 2.03                                                              | 0.55                                                                   | 0.94                                                               | 1.00                                                                    |
| <i>HNRNPA1</i>   | 0                                    | 1                                       | 18                                             | 0.68                                                              | 1.00                                                                   | 0.20                                                               | 0.26                                                                    |
| <i>HNRNPA2B1</i> | NA                                   | NA                                      | NA                                             | NA                                                                | NA                                                                     | NA                                                                 | NA                                                                      |
| <i>KIF5A</i>     | 3                                    | 0                                       | 2                                              | 14.21                                                             | 0.04                                                                   | 11.23                                                              | 0.01#                                                                   |
| <i>MAPT</i>      | 0                                    | 2                                       | 46                                             | 0.41                                                              | 1.00                                                                   | 0.08                                                               | 5.067×10 <sup>-3</sup> #                                                |

|                |    |    |    |       |            |       |             |
|----------------|----|----|----|-------|------------|-------|-------------|
| <i>MATR3</i>   | NA | NA | NA | NA    | NA         | NA    | NA          |
| <i>MOBP</i>    | NA | NA | NA | NA    | NA         | NA    | NA          |
| <i>NEFH</i>    | 0  | 1  | 8  | 0.68  | 1.00       | 0.44  | 0.61        |
| <i>NEK1</i>    | 25 | 4  | 29 | 12.80 | 4.59×10-9* | 6.48  | 3.03×10-10# |
| <i>OPTN</i>    | 13 | 4  | 38 | 6.60  | 3.04×10-4  | 2.56  | 6.90×10-3   |
| <i>PFNI</i>    | NA | NA | NA | NA    | NA         | NA    | NA          |
| <i>PNPLA6</i>  | 3  | 8  | 44 | 0.76  | 1.00       | 0.51  | 0.36        |
| <i>PRPH</i>    | 1  | 2  | 20 | 1.01  | 1.00       | 0.37  | 0.50        |
| <i>SCFD1</i>   | 0  | 1  | 12 | 0.68  | 1.00       | 0.30  | 0.38        |
| <i>SETX</i>    | 1  | 4  | 28 | 0.51  | 1.00       | 0.27  | 0.25        |
| <i>SIGMAR1</i> | 1  | 0  | 3  | 6.09  | 0.33       | 2.49  | 0.39        |
| <i>SOD1</i>    | 1  | 1  | 2  | 2.03  | 0.55       | 3.74  | 0.31        |
| <i>SQSTM1</i>  | 0  | 3  | 9  | 0.11  | 0.56       | 0.39  | 0.61        |
| <i>TAF15</i>   | NA | NA | NA | NA    | NA         | NA    | NA          |
| <i>TARDBP</i>  | NA | NA | NA | NA    | NA         | NA    | NA          |
| <i>TBK1</i>    | 5  | 0  | 3  | 22.34 | 3.92×10-3  | 12.48 | 9.35×10-4#  |
| <i>UBQLN2</i>  | NA | NA | NA | NA    | NA         | NA    | NA          |
| <i>UNC13A</i>  | NA | NA | NA | NA    | NA         | NA    | NA          |
| <i>VAPB</i>    | NA | NA | NA | NA    | NA         | NA    | NA          |
| <i>VCP</i>     | NA | NA | NA | NA    | NA         | NA    | NA          |

\*Passed exome-wide significance (P-value <2.5×10-6) in first analysis (3,864 cases and 7,839 controls).

#OR direction is maintained in secondary analysis (3,864 cases and 28,910 controls) and P-value is lower.

NA values in cells implies there were no qualifying variants in this gene under this model. The results displayed are from a burden analysis using Fisher's exact test as well as SKAT, with previously defined covariates (sample sex,

PC1-PC10, and total exome count). Exome-wide correction for multiple testing was set at ( $P < 2.5 \times 10^{-6}$ ), which was the 5% type-I error rate multiplied by the number of genes tested.

**Supplementary Table 3. Proposed ALS genes and their signals under the damaging missense model**

| Gene             | Qualifying variants in cases (3,864) | Qualifying variants in controls (7,839) | Qualifying variants in total controls (28,910) | OR<br>N <sub>cases</sub> : 3,864<br>N <sub>controls</sub> : 7,839 | P-value<br>N <sub>cases</sub> : 3,864<br>N <sub>controls</sub> : 7,839 | OR<br>N <sub>cases</sub> : 3,864<br>N <sub>controls</sub> : 28,910 | P-value<br>N <sub>cases</sub> : 3,864<br>N <sub>controls</sub> : 28,910 |
|------------------|--------------------------------------|-----------------------------------------|------------------------------------------------|-------------------------------------------------------------------|------------------------------------------------------------------------|--------------------------------------------------------------------|-------------------------------------------------------------------------|
| <i>ALS2</i>      | 7                                    | 17                                      | 73                                             | 0.84                                                              | 0.83                                                                   | 0.72                                                               | 0.49                                                                    |
| <i>ANG</i>       | 0                                    | 2                                       | 8                                              | 0.41                                                              | 1.00                                                                   | 0.44                                                               | 0.61                                                                    |
| <i>ARHGEF28</i>  | 12                                   | 14                                      | 128                                            | 1.74                                                              | 0.21                                                                   | 0.70                                                               | 0.29                                                                    |
| <i>ARPP21</i>    | 3                                    | 5                                       | 55                                             | 1.22                                                              | 0.72                                                                   | 0.41                                                               | 0.15                                                                    |
| <i>ATXN2</i>     | NA                                   | NA                                      | NA                                             | NA                                                                | NA                                                                     | NA                                                                 | NA                                                                      |
| <i>C21orf2</i>   | 1                                    | 3                                       | 33                                             | 0.68                                                              | 1.00                                                                   | 0.23                                                               | 0.18                                                                    |
| <i>C9orf72</i>   | 1                                    | 5                                       | 25                                             | 0.41                                                              | 0.67                                                                   | 0.30                                                               | 0.36                                                                    |
| <i>CENPV</i>     | 1                                    | 2                                       | 13                                             | 1.01                                                              | 1.00                                                                   | 0.58                                                               | 1.00                                                                    |
| <i>CHMP2B</i>    | 3                                    | 1                                       | 9                                              | 6.09                                                              | 0.11                                                                   | 2.49                                                               | 0.16                                                                    |
| <i>DAO</i>       | 3                                    | 20                                      | 114                                            | 0.30                                                              | 0.05                                                                   | 0.20                                                               | $7.52 \times 10^{-4\#}$                                                 |
| <i>DCTN1</i>     | 9                                    | 15                                      | 70                                             | 1.22                                                              | 0.67                                                                   | 0.96                                                               | 1.00                                                                    |
| <i>FIG4</i>      | 7                                    | 11                                      | 51                                             | 1.29                                                              | 0.62                                                                   | 1.03                                                               | 0.84                                                                    |
| <i>FUS</i>       | 0                                    | 2                                       | 7                                              | 0.41                                                              | 1.00                                                                   | 0.50                                                               | 1.00                                                                    |
| <i>GRN</i>       | 11                                   | 13                                      | 59                                             | 1.72                                                              | 0.20                                                                   | 1.40                                                               | 0.35                                                                    |
| <i>HNRNPA1</i>   | NA                                   | NA                                      | NA                                             | NA                                                                | NA                                                                     | NA                                                                 | NA                                                                      |
| <i>HNRNPA2B1</i> | 0                                    | 1                                       | 2                                              | 0.68                                                              | 1.00                                                                   | 1.50                                                               | 1.00                                                                    |

|                |    |    |     |       |             |       |             |
|----------------|----|----|-----|-------|-------------|-------|-------------|
| <i>KIF5A</i>   | 3  | 8  | 31  | 0.76  | 1.00        | 0.72  | 0.79        |
| <i>MAPT</i>    | 7  | 8  | 49  | 1.78  | 0.28        | 1.07  | 0.84        |
| <i>MATR3</i>   | 6  | 2  | 7   | 6.09  | 0.02        | 6.42  | 2.19×10-3#  |
| <i>MOBP</i>    | NA | NA | NA  | NA    | NA          | NA    | NA          |
| <i>NEFH</i>    | NA | NA | NA  | NA    | NA          | NA    | NA          |
| <i>NEK1</i>    | 10 | 22 | 93  | 0.92  | 1.00        | 0.80  | 0.65        |
| <i>OPTN</i>    | 12 | 5  | 34  | 4.88  | 2.79×10-3   | 2.65  | 8.99×10-3   |
| <i>PFN1</i>    | 0  | 1  | 65  | 0.68  | 1.00        | 0.06  | 6.70×10-4#  |
| <i>PNPLA6</i>  | 7  | 11 | 67  | 1.29  | 0.62        | 0.78  | 0.72        |
| <i>PRPH</i>    | 8  | 13 | 69  | 1.25  | 0.65        | 0.87  | 0.86        |
| <i>SCFD1</i>   | 3  | 8  | 35  | 0.76  | 1.00        | 0.64  | 0.62        |
| <i>SETX</i>    | 32 | 48 | 265 | 1.36  | 0.19        | 0.90  | 0.65        |
| <i>SIGMAR1</i> | 1  | 2  | 18  | 1.01  | 1.00        | 0.42  | 0.72        |
| <i>SOD1</i>    | 21 | 0  | 2   | 87.70 | 7.55×10-11* | 78.98 | 6.04×10-18# |
| <i>SQSTM1</i>  | 5  | 11 | 38  | 0.92  | 1.00        | 0.98  | 1.00        |
| <i>TAF15</i>   | NA | NA | NA  | NA    | NA          | NA    | NA          |
| <i>TARDBP</i>  | NA | NA | NA  | NA    | NA          | NA    | NA          |
| <i>TBK1</i>    | 6  | 5  | 24  | 2.44  | 0.20        | 1.87  | 0.16        |
| <i>UBQLN2</i>  | 0  | 3  | 15  | 0.29  | 0.56        | 0.24  | 0.24        |
| <i>UNC13A</i>  | 7  | 6  | 49  | 2.37  | 0.14        | 1.07  | 0.84        |
| <i>VAPB</i>    | 2  | 1  | 4   | 4.06  | 0.26        | 3.74  | 0.15        |

|     |   |   |    |       |                       |      |      |
|-----|---|---|----|-------|-----------------------|------|------|
| VCP | 6 | 0 | 18 | 26.41 | 1.29×10 <sup>-3</sup> | 2.50 | 0.06 |
|-----|---|---|----|-------|-----------------------|------|------|

\*Passed exome-wide significance (P-value <2.5×10<sup>-6</sup>) in first analysis (3,864 cases and 7,839 controls).

#OR direction is maintained in secondary analysis (3,864 cases and 28,910 controls) and P-value is lower.

NA values in cells implies there were no qualifying variants in this gene under this model. The results displayed are from a burden analysis using Fisher's exact test as well as SKAT, with previously defined covariates (sample sex, PC1-PC10, and total exome count). Exome-wide correction for multiple testing was set at (P<2.5×10<sup>-6</sup>), which was the 5% type-I error rate multiplied by the number of genes tested.

#### Supplementary Table 4. Summary of HSP genes and associated neurological diseases.

| Gene           | Disease                                                                           | ClinVar entries |                   |
|----------------|-----------------------------------------------------------------------------------|-----------------|-------------------|
|                |                                                                                   | Pathogenic      | Likely pathogenic |
| <i>DNAJB2</i>  | Charcot-Marie-Tooth disease, spinal muscular atrophy, distal,                     | 7               | 2                 |
| <i>DNAJB5</i>  | Peripheral neuropathy, skeletal myopathy, peripheral neuropathy                   | 0               | 1                 |
| <i>DNAJB6</i>  | Limb-girdle muscular dystrophy, type 1E; frontotemporal dementia                  | 9               | 2                 |
| <i>DNAJB13</i> | Ciliary dyskinesia, primary, 34                                                   | 2               | 0                 |
| <i>DNAJC3</i>  | Combined cerebellar and peripheral ataxia with hearing loss and diabetes mellitus | 0               | 1                 |
| <i>DNAJC5</i>  | Neuronal ceroid lipofuscinosis                                                    | 2               | 0                 |
| <i>DNAJC6</i>  | Early onset Parkinson disease                                                     | 5               | 0                 |
| <i>DNAJC7</i>  | Amyotrophic lateral sclerosis                                                     | 0               | 0                 |
| <i>DNAJC11</i> | Spasticity, motor neuron pathology                                                | 0               | 0                 |
| <i>DNAJC12</i> | Hyperphenylalaninemia, mild, non-bh4-deficient                                    | 2               | 0                 |
| <i>DNAJC13</i> | Parkinson disease                                                                 | 0               | 0                 |
| <i>DNAJC19</i> | 3-methylglutaconic aciduria type V                                                | 2               | 1                 |
| <i>DNAJC29</i> | Spastic ataxia of Charlevoix Saguenay                                             | 0               | 0                 |
| <i>HSPB1</i>   | Charcot-Marie-Tooth disease, distal hereditary motor neuropathy                   | 12              | 13                |
| <i>HSPB8</i>   | Charcot-Marie-Tooth disease, distal hereditary motor neuropathy                   | 4               | 2                 |
| <i>HSPD1</i>   | Spastic paraplegia                                                                | 2               | 2                 |
| <i>CCT5</i>    | Neuropathy, hereditary sensory, with spastic paraplegia                           | 0               | 1                 |

Some genes are associated with a disease but no pathogenic or likely pathogenic variants were reported in ClinVar.

#### Supplementary Table 5. Neurodegenerative disease genes

|              |                |                |               |                 |               |               |               |                |               |               |
|--------------|----------------|----------------|---------------|-----------------|---------------|---------------|---------------|----------------|---------------|---------------|
| <i>ABCA7</i> | <i>BST1</i>    | <i>CSF1R</i>   | <i>ECHDC3</i> | <i>GCH1</i>     | <i>ITM2B</i>  | <i>NR4A2</i>  | <i>PLD3</i>   | <i>SCARB2</i>  | <i>SPPL2A</i> | <i>TYROBP</i> |
| <i>ACMSD</i> | <i>C9orf72</i> | <i>DAO</i>     | <i>EIF4G1</i> | <i>GIGYF2</i>   | <i>LRRK2</i>  | <i>NUCKS1</i> | <i>PM20D1</i> | <i>SCIMP</i>   | <i>SQSTM1</i> | <i>UBA1</i>   |
| <i>ALS2</i>  | <i>CASS4</i>   | <i>DCTN1</i>   | <i>EPHA1</i>  | <i>GPNMB</i>    | <i>MAPT</i>   | <i>OPTN</i>   | <i>PNPLA6</i> | <i>SETX</i>    | <i>STK39</i>  | <i>UBQLN2</i> |
| <i>ANG</i>   | <i>CCDC62</i>  | <i>DDRKG1</i>  | <i>FAM47E</i> | <i>GRN</i>      | <i>MC1R</i>   | <i>PANK2</i>  | <i>PRNP</i>   | <i>SIGMAR1</i> | <i>STX1B</i>  | <i>UCHL1</i>  |
| <i>APOE</i>  | <i>CD2AP</i>   | <i>DGKQ</i>    | <i>FBXO7</i>  | <i>HBEGF</i>    | <i>MCCC1</i>  | <i>PARK2</i>  | <i>PRPH</i>   | <i>SIPAIL2</i> | <i>TAF15</i>  | <i>UNC13A</i> |
| <i>APP</i>   | <i>CD33</i>    | <i>DLG2</i>    | <i>FERMT2</i> | <i>HLA-DRB5</i> | <i>MEF2C</i>  | <i>PARK7</i>  | <i>PSEN1</i>  | <i>SLC24A4</i> | <i>TARDBP</i> | <i>VAPB</i>   |
| <i>AR</i>    | <i>CELFI</i>   | <i>DNAJC13</i> | <i>FGF20</i>  | <i>HNRNPA1</i>  | <i>MS4A4E</i> | <i>PARL</i>   | <i>PSEN2</i>  | <i>SMN1</i>    | <i>TBK1</i>   | <i>VCP</i>    |

|                |               |                |             |                  |               |               |               |              |                 |               |
|----------------|---------------|----------------|-------------|------------------|---------------|---------------|---------------|--------------|-----------------|---------------|
| <i>ARPP21</i>  | <i>CENPV</i>  | <i>DNAJC6</i>  | <i>FIG4</i> | <i>HNRNPA2B1</i> | <i>MS4A6A</i> | <i>PFN1</i>   | <i>PTGER2</i> | <i>SMN2</i>  | <i>TMEM163</i>  | <i>VPS13C</i> |
| <i>ATP13A2</i> | <i>CHMP2B</i> | <i>DNMT1</i>   | <i>FUS</i>  | <i>HTRA2</i>     | <i>NEFH</i>   | <i>PICALM</i> | <i>PTK2B</i>  | <i>SNCA</i>  | <i>TMEM175</i>  | <i>VPS35</i>  |
| <i>ATXN2</i>   | <i>CLU</i>    | <i>DSG2</i>    | <i>GAK</i>  | <i>INPP5D</i>    | <i>NEK1</i>   | <i>PINK1</i>  | <i>RAB7L1</i> | <i>SOD1</i>  | <i>TMEM229B</i> | <i>ZCWPW1</i> |
| <i>BIN1</i>    | <i>CR1</i>    | <i>DYNC1H1</i> | <i>GBA</i>  | <i>INPP5F</i>    | <i>NME8</i>   | <i>PLA2G6</i> | <i>RIT2</i>   | <i>SORL1</i> | <i>TREM2</i>    |               |
